# Supplementary material
Source: publisher site journal article supplement (https://www.dovepress.com/article/561486)
Supplement: Supplementary file 1 [file 561486_Supplementary%2520File2.pdf]

**COMPUTER VISION SYMPTOM SCALE (CVSS17)**

Final, cross-culturally adapted, English Version

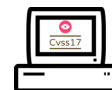

**THE QUESTIONS THAT FOLLOW ASK ABOUT HOW YOU FELT OVER THE PAST FOUR WEEKS WHILE AT WORK.\*:**

\*If you normally wear glasses or contact lenses during most working hours, please describe how you felt while wearing this correction.

**While working on the computer for a while  
(please circle the appropriate response):**

**A2. Did the letters on the screen become blurry?**

- |                      |                |              |
|----------------------|----------------|--------------|
| 1. Never             | 2. Very Little | 3. Little    |
| 4. A moderate amount | 5. Much        | 6. Very Much |

**A4. Did your eyes become tired?**

- |               |                  |           |                 |
|---------------|------------------|-----------|-----------------|
| 1. Never      | 2. Almost Never  | 3. Seldom | 4. Occasionally |
| 5. Frequently | 6. Almost Always | 7. Always |                 |

**A9. Did your eyes hurt?**

- |          |           |               |               |
|----------|-----------|---------------|---------------|
| 1. Never | 2. Rarely | 3. Frequently | 4. Constantly |
|----------|-----------|---------------|---------------|

**A17. After working on the computer for a while did your eyes become heavy?**

- |          |           |               |               |
|----------|-----------|---------------|---------------|
| 1. Never | 2. Rarely | 3. Frequently | 4. Constantly |
|----------|-----------|---------------|---------------|

**A20. Did you have to blink more than usual?**

- |          |           |               |               |
|----------|-----------|---------------|---------------|
| 1. Never | 2. Rarely | 3. Frequently | 4. Constantly |
|----------|-----------|---------------|---------------|

**A21. Did your eyes burn?**

- |          |           |               |               |
|----------|-----------|---------------|---------------|
| 1. Never | 2. Rarely | 3. Frequently | 4. Constantly |
|----------|-----------|---------------|---------------|

**A22. Did you have to strain to see well?**

- |                      |                |              |
|----------------------|----------------|--------------|
| 1. Not at all        | 2. Very little | 3. A Little  |
| 4. A moderate amount | 5. Much        | 6. Very Much |

**A28. Did you feel like you were crossing your eyes?**

- |          |           |               |               |
|----------|-----------|---------------|---------------|
| 1. Never | 2. Rarely | 3. Frequently | 4. Constantly |
|----------|-----------|---------------|---------------|

**A30. Did the letters appear double?**

- |                      |                |              |
|----------------------|----------------|--------------|
| 1. Not at all        | 2. Very little | 3. A Little  |
| 4. A moderate amount | 5. Much        | 6. Very Much |

**A32. Did your eyes sting?**

- |          |           |               |               |
|----------|-----------|---------------|---------------|
| 1. Never | 2. Rarely | 3. Frequently | 4. Constantly |
|----------|-----------|---------------|---------------|

**A33. After working on the computer for a while did lights bother you?**

- |                  |                 |                |
|------------------|-----------------|----------------|
| 1. Never         | 2. Almost never | 3. A few times |
| 4. Several times | 5. Often        | 6. Very often  |

# COMPUTER VISION SYMPTOM SCALE (CVSS17)

Final, cross-culturally adapted, English Version

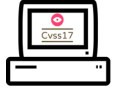

OVER THE PAST FOUR WEEKS WHILE AT WORK, PLEASE INDICATE TO WHAT EXTENT YOU HAVE EXPERIENCED ANY OF THE FOLLOWING:

|                        | 1. None | 2. Very little | 3. Little | 4. A moderate amount | 5. Much | 6. Very much |
|------------------------|---------|----------------|-----------|----------------------|---------|--------------|
| <b>B7. Watery Eyes</b> |         |                |           |                      |         |              |
| <b>B8. Eye redness</b> |         |                |           |                      |         |              |

TO FINISH, PLEASE INDICATE TO WHAT EXTENT YOU AGREE OR DISAGREE EACH ONE OF THE FOLLOWING STATEMENTS\*:

\*If you normally wear glasses or contact lenses during most of your working hours, answer as if you were wearing them.

**C16. At the end of my working day, my eyes feel heavy**

- 1. Strongly Disagree
- 2. Slightly Disagree
- 3. Slightly Agree
- 4. Strongly Agree

**C21. After working at the computer, I have to strain to see well**

- 1. Strongly Disagree
- 2. Slightly Disagree
- 3. Slightly Agree
- 4. Strongly Agree

**C23. I have to shut my eyes hard to relieve dryness when using these devices**

- 1. Strongly Disagree
- 2. Slightly Disagree
- 3. Slightly Agree
- 4. Strongly Agree

**C24. After some time at the computer, lights bother me**

- 1. Strongly Disagree
- 2. Slightly Disagree
- 3. Slightly Agree
- 4. Strongly Agree

**Note:** This version replaces the preliminary, self-developed English version provided in the CVSS17 Spanish version development paper (<https://doi.org/10.1167/iavs.13-13818>). Clinicians and researchers interested in administering the English version of the CVSS17 must use the current validated version.
